# Supplementary material for: A glycoprotein B-neutralizing antibody structure at 2.8 Å uncovers a critical domain for herpesvirus fusion initiation
Source: PubMed Central journal article supplement (PMC7435202; doi:10.1038/s41467-020-17911-0), 2020-08-18
Supplement: 41467_2020_17911_MOESM1_ESM.pdf [file 41467_2020_17911_MOESM1_ESM.pdf]

**Supplementary Information**

**For**

**A Glycoprotein B-Neutralizing Antibody Structure at 2.8Å  
Uncovers a Critical Domain for Herpesvirus Fusion Initiation.**

Oliver et al.

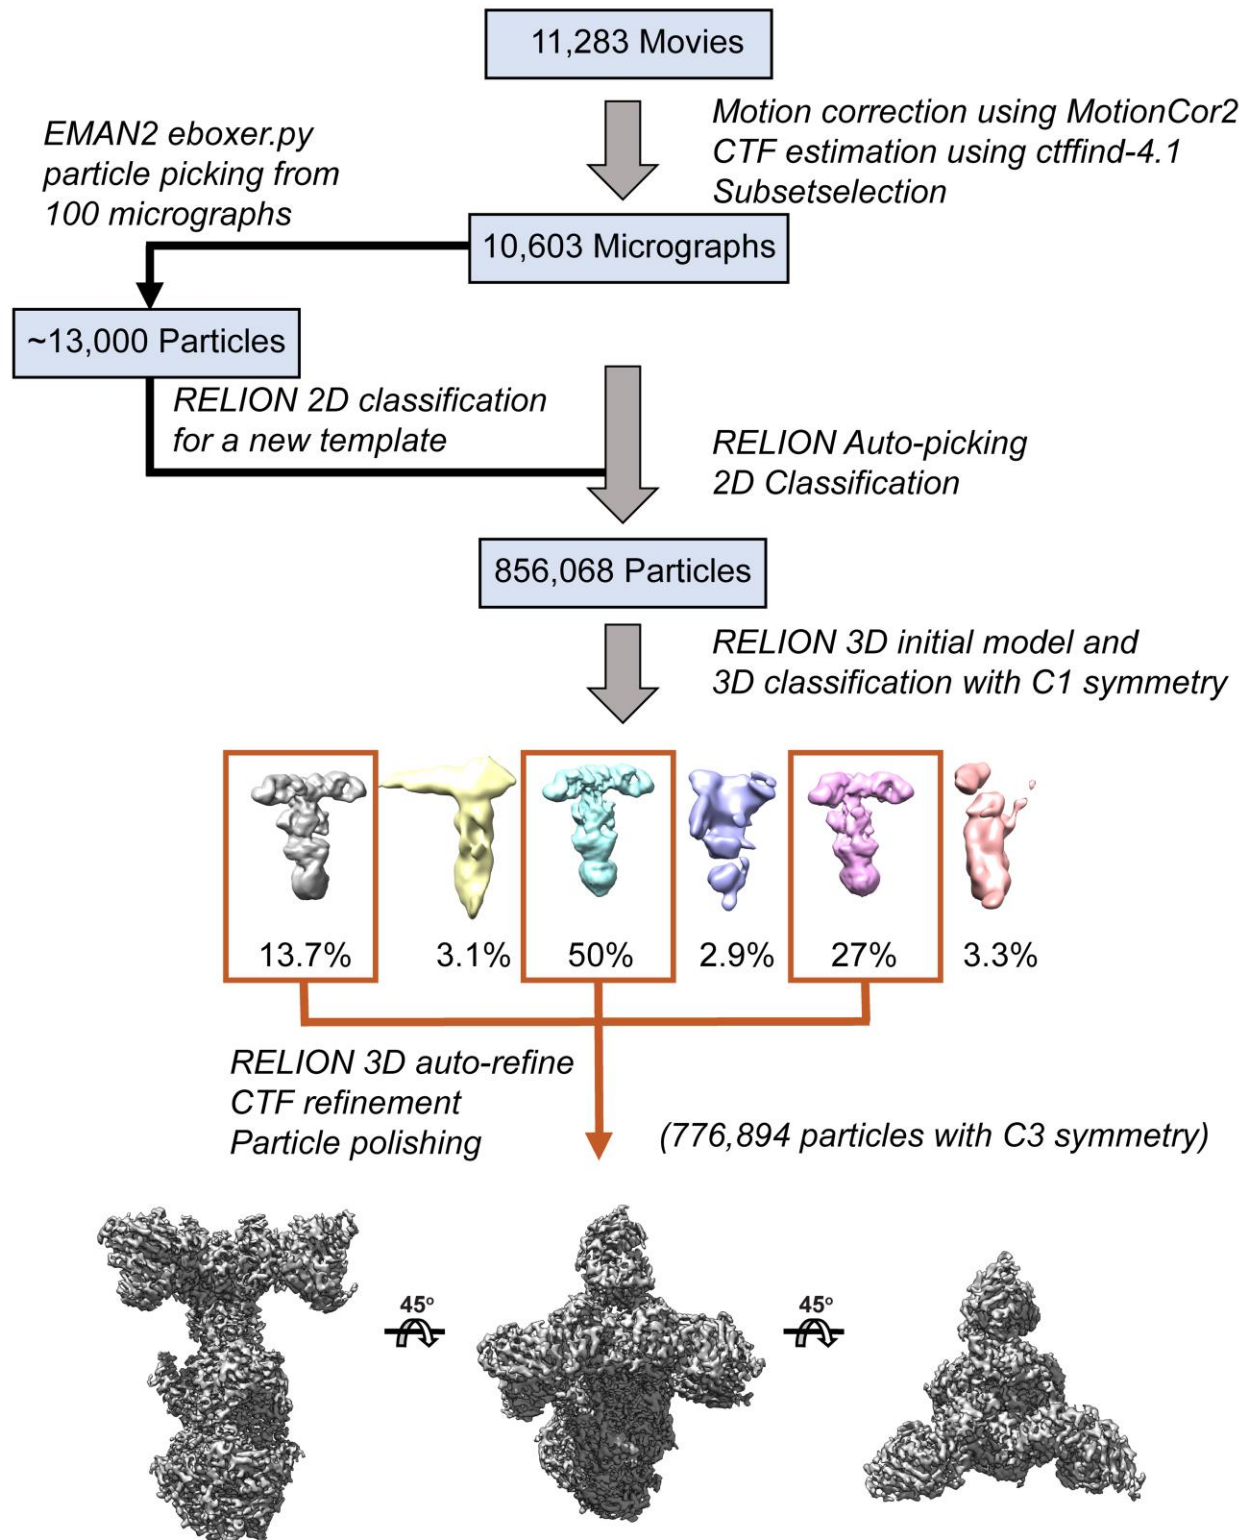

**Supplementary Figure 1. Classification scheme of particles identified in cryo-EM micrographs of purified native VZV gB in complex with 93k Fab fragments.**

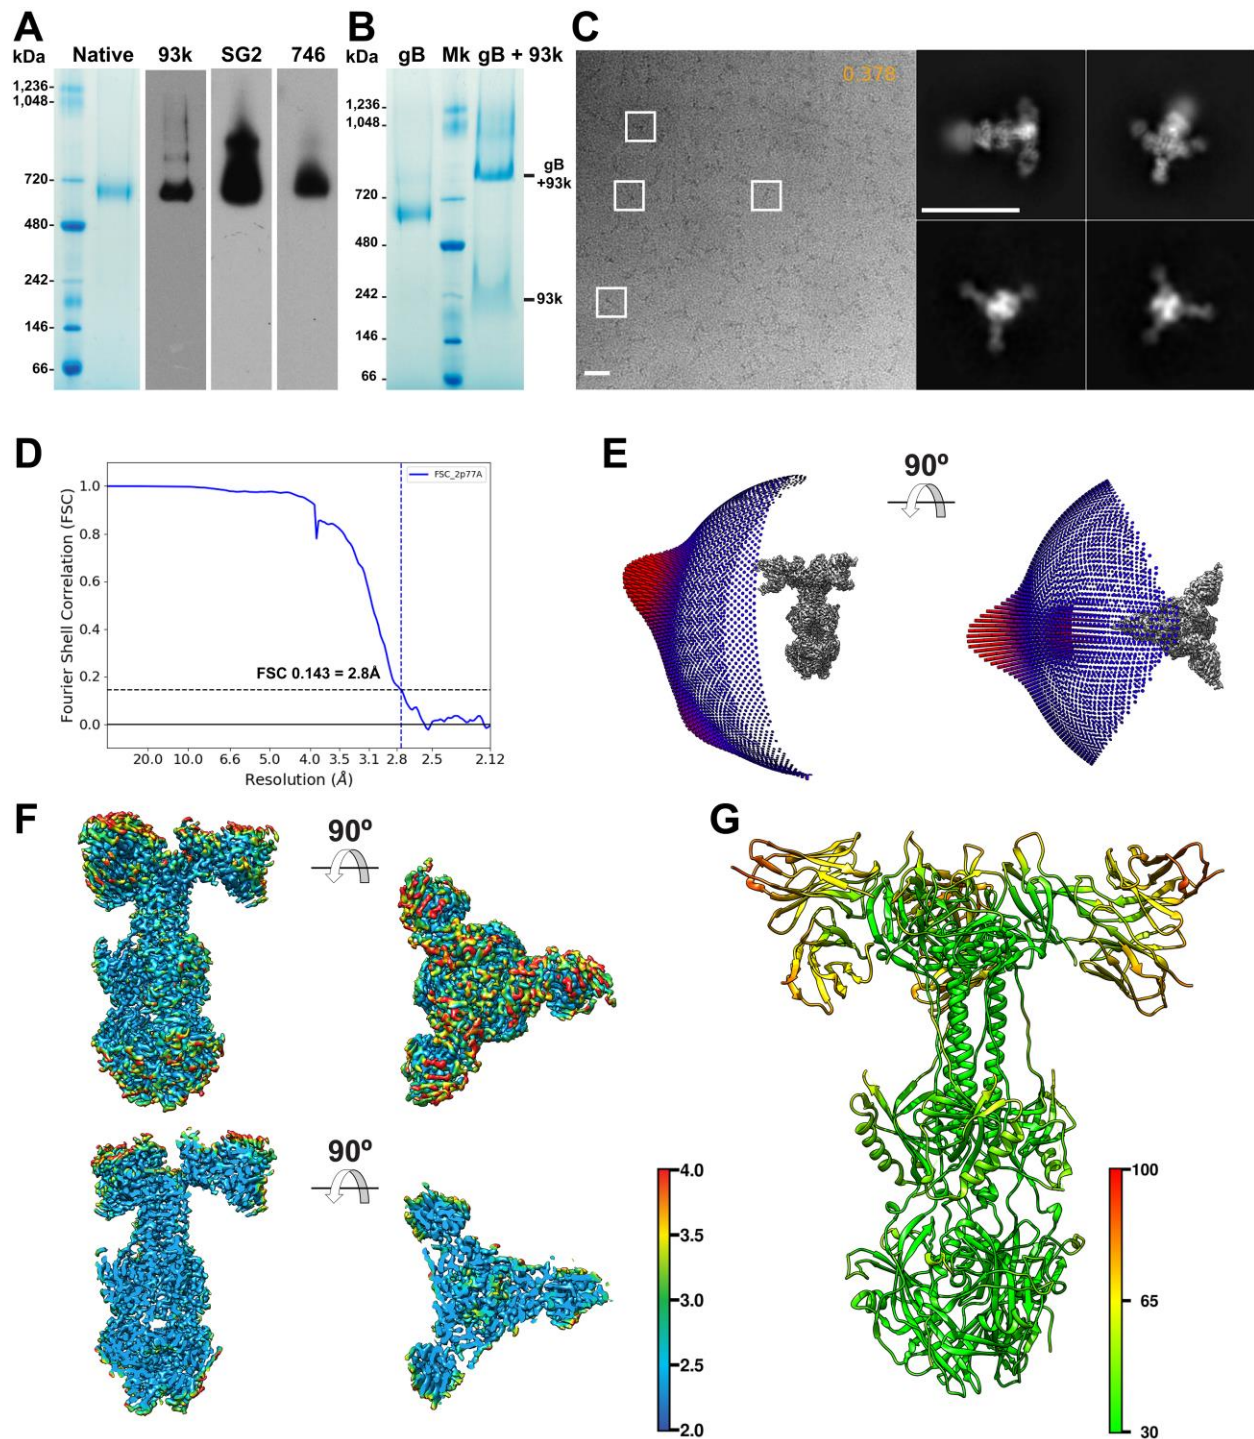

**Supplementary Figure 2. Near atomic resolution (2.8Å) structure of 93k Fab fragments bound to gB purified from VZV infected MeWo cells.** A – Native PAGE of purified native VZV gB and western blots with VZV gB specific antibodies 93k (Hu mAb), SG2 (Mu mAb) and 746-868 (Rb IgG). Molecular weights of the protein standards are given to the left of the gel (kDa). B – Native PAGE of purified VZV gB and the formation of the gB-93k Fab complex. C – Single particle cryo-EM micrograph of purified VZV gB in complex with 93k Fab fragments post size exclusion chromatography in vitreous ice on a lacey carbon grid with four

representative 2D class averages. Scale bars (white) 20nm. D and E – Fourier shell correlation plot (E; FSC 0.143 = 2.8Å) and Euler angle distribution (E) of VZV gB-93k particles included in the 3D reconstruction. F – Local resolution of the cryo-EM map quantified using ResMap <sup>1</sup>. G – A model of the VZV gB-93k complex represented in ribbons and colored according to B-factors derived from structure refinement using Phenix <sup>2</sup>.

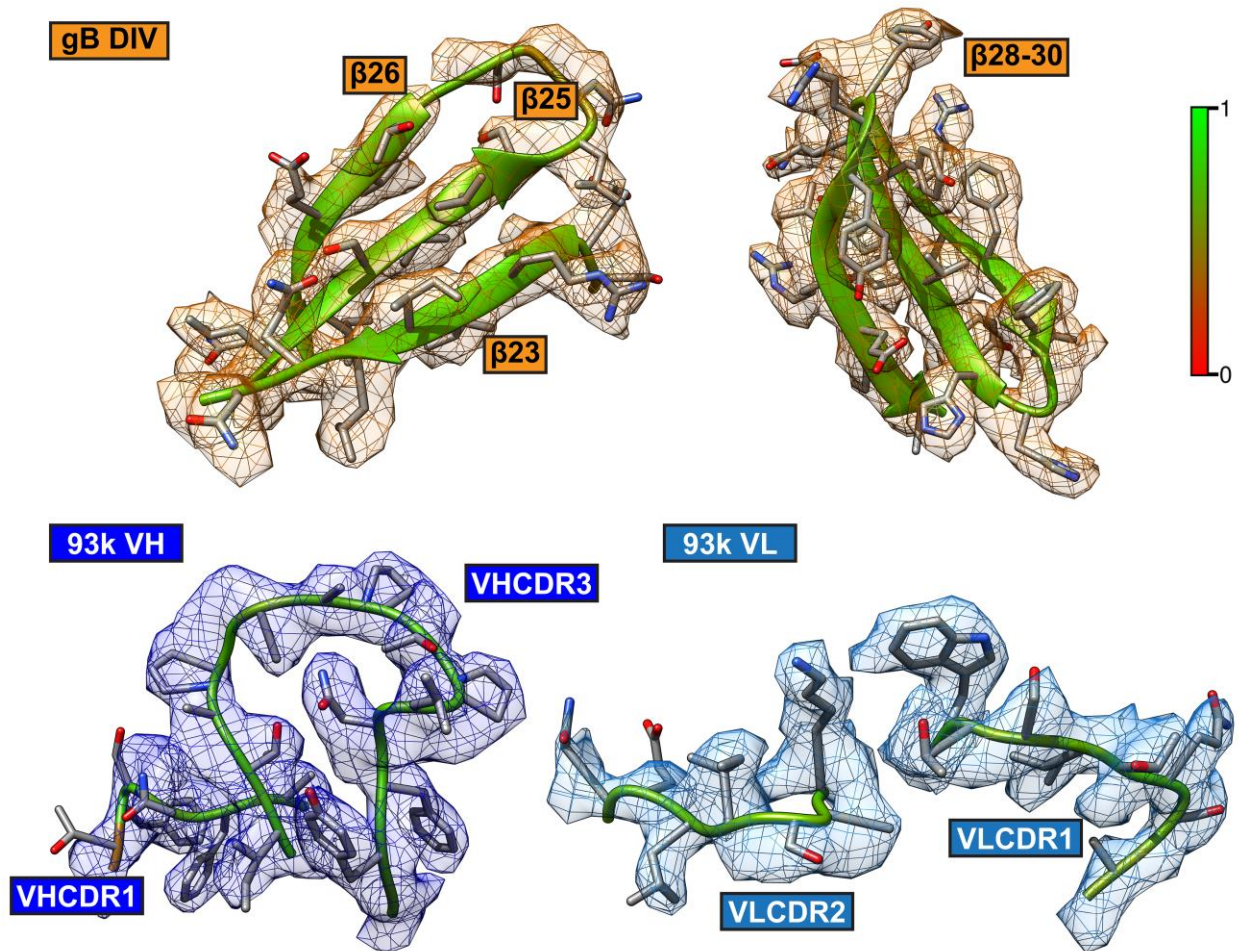

**Supplementary Figure 3. Amino acid side chain resolvability at the gB-93k interface in the 2.8Å cryo-EM map.** MapQ<sup>3</sup> was used to calculate Q-scores (0 to 1; low to high) for the side chain resolvability. Segmentation and ribbon representations with the amino acid side chains of VZV gB  $\beta$  strands 23, 25, 26 and 28-30 and the 93k VH CDR1, VH CDR3, VL CDR1 and VL CDR2, which form the gB-93k interface. Orientations of the representations are the same as those in Fig. 1G. The scale represents Q-score values.



### 93k VH

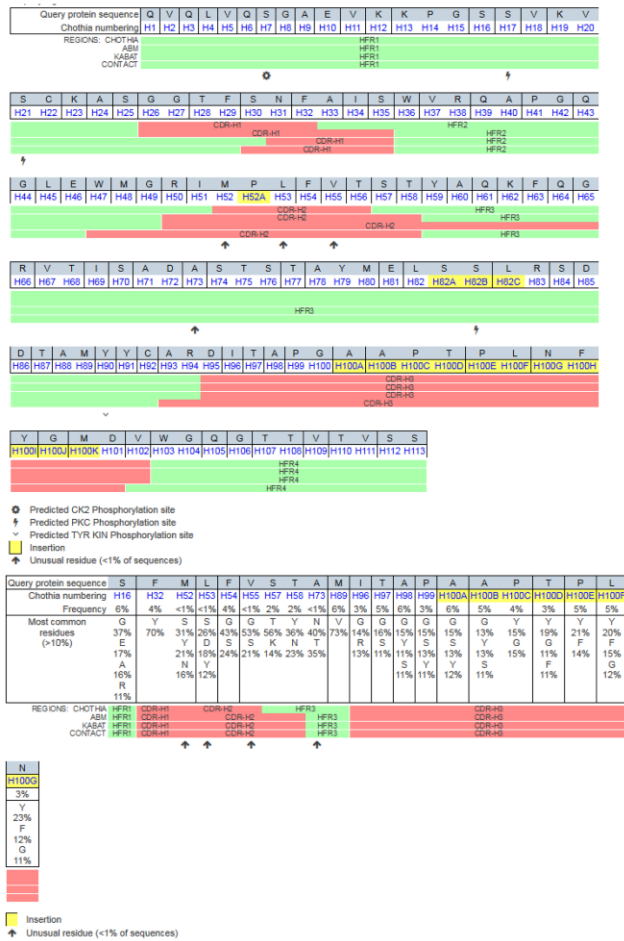

### 93k VL

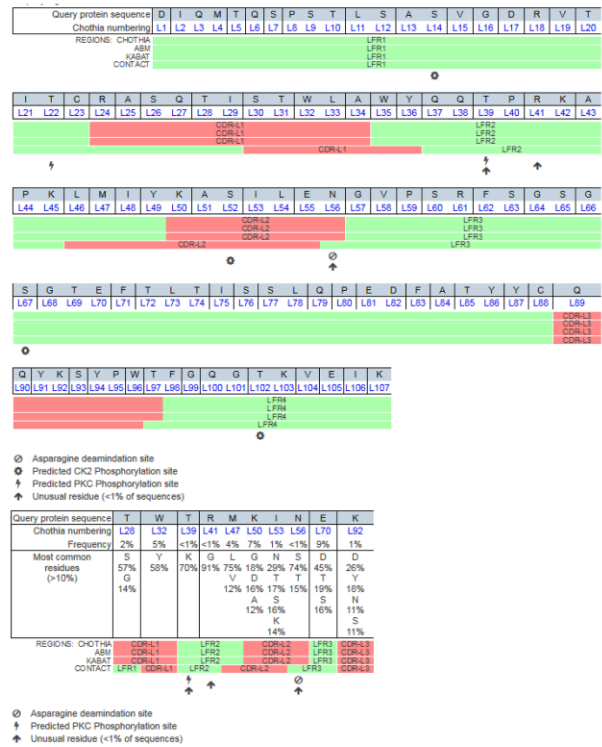

**Supplementary Figure 4. Comparison of the mAb 93k VH and VL sequences with all other human monoclonal antibodies.** Annotation of the mAb 93k VH and VL chains using the abYsis server (<http://www.abysis.org/>) to determine the frequency and location of amino acid insertions in the VH or VL chains, and the quantities of unusual amino acids in the CDR regions. Comparison of the mAb 93k VH and VL sequences with all other human monoclonal antibodies (94,157 chains, *Homo sapiens*) revealed three insertion sites in the VH chain (Chothia numbering; H52A, H82A-C and H100A-K) but none in the VL chain. The largest insertion site was within the VHCDR3 and consisted of 11 amino acids not commonly found in human mAbs.

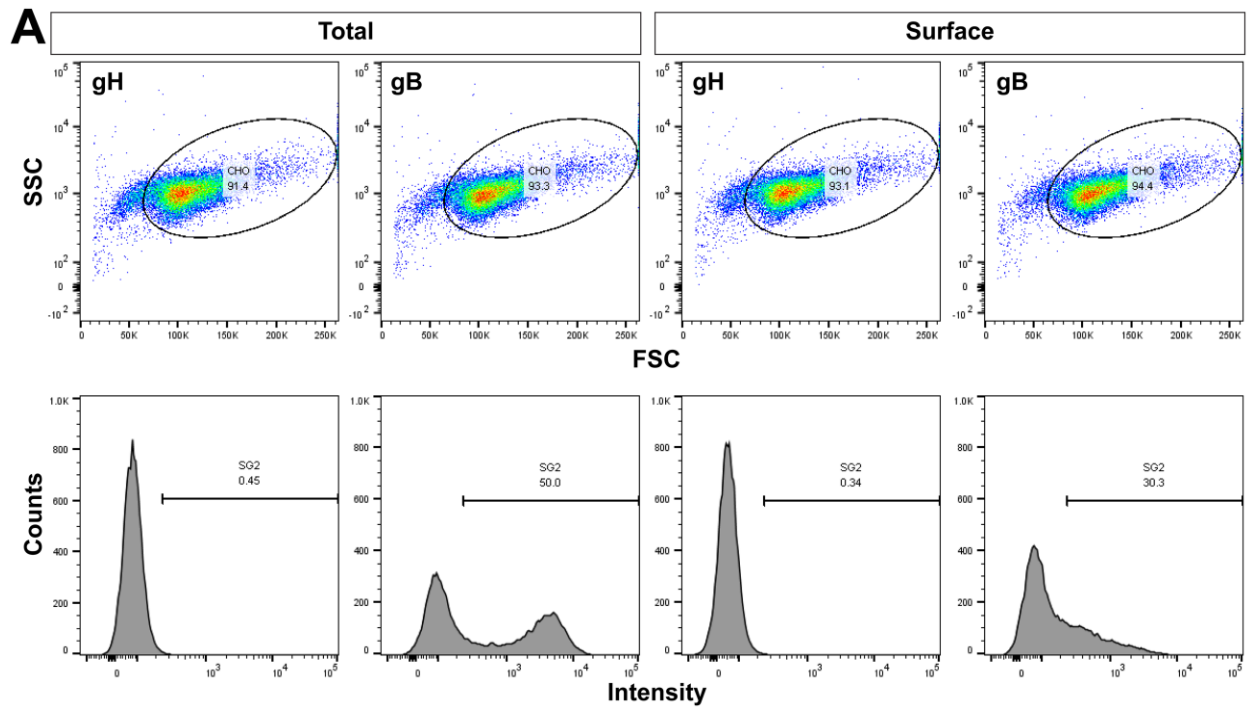

**B**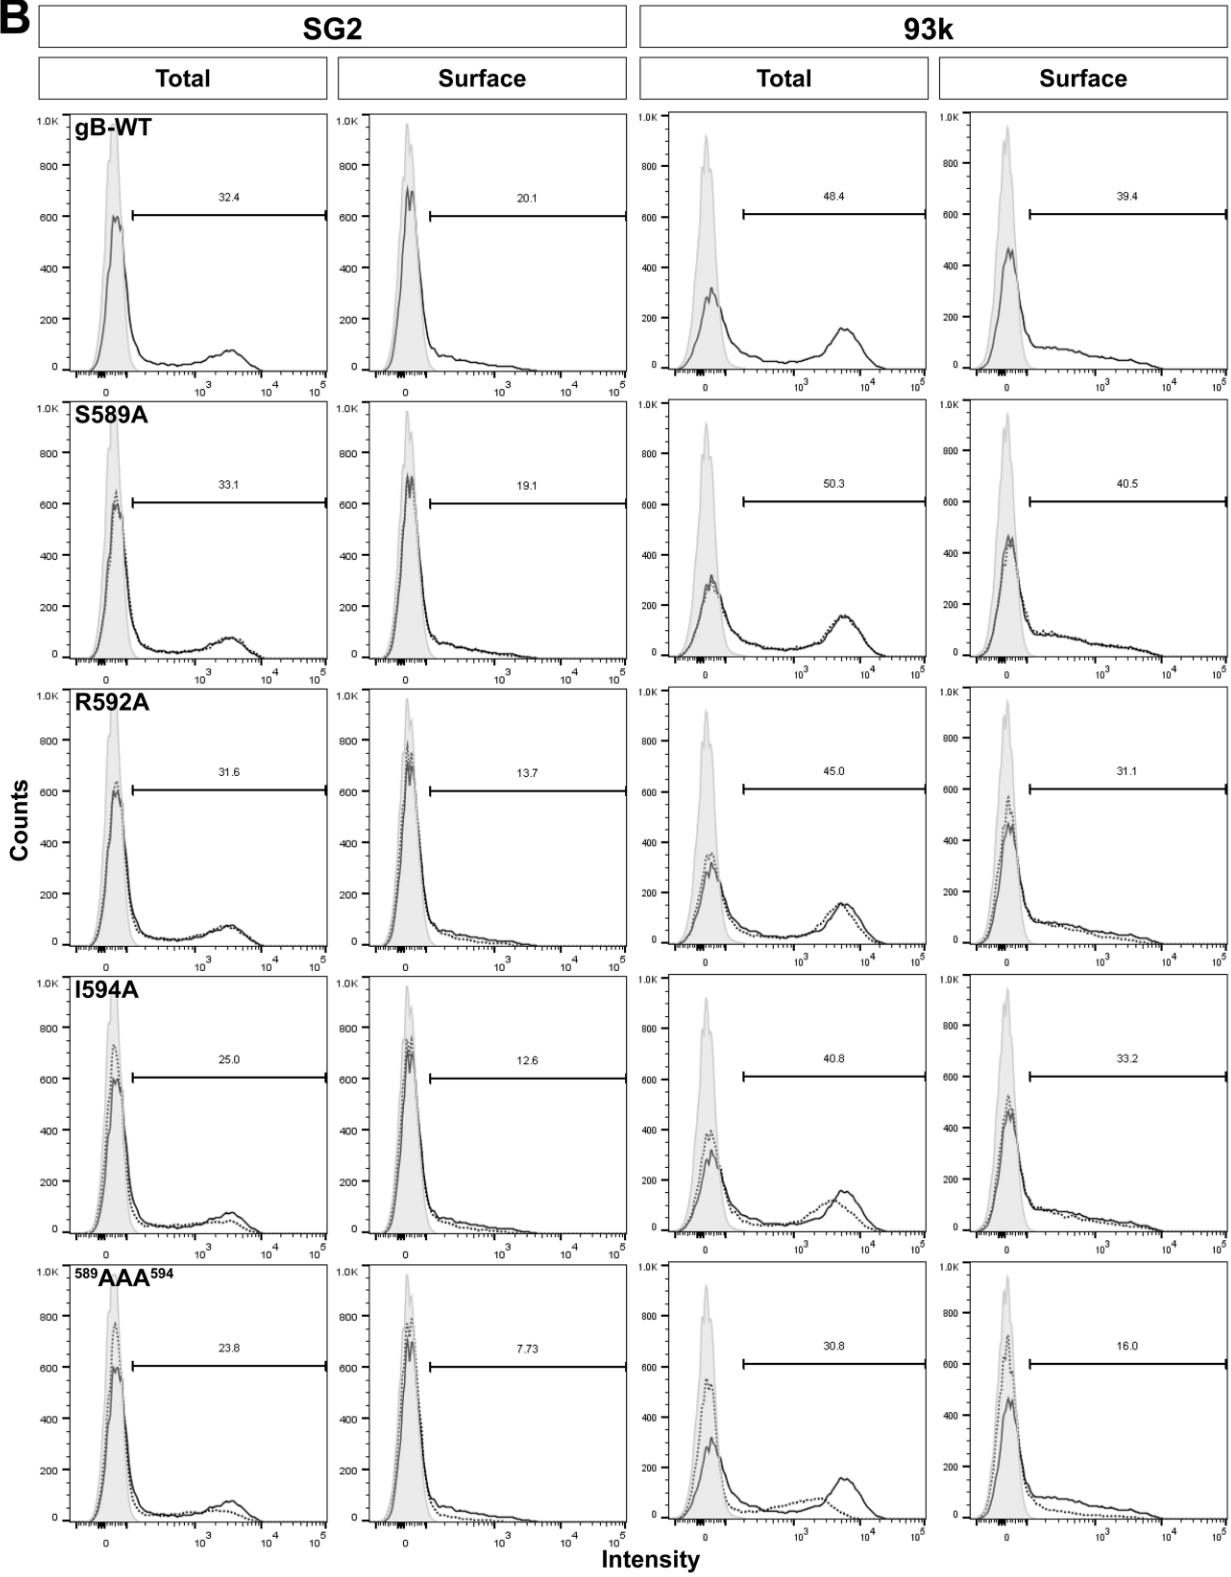



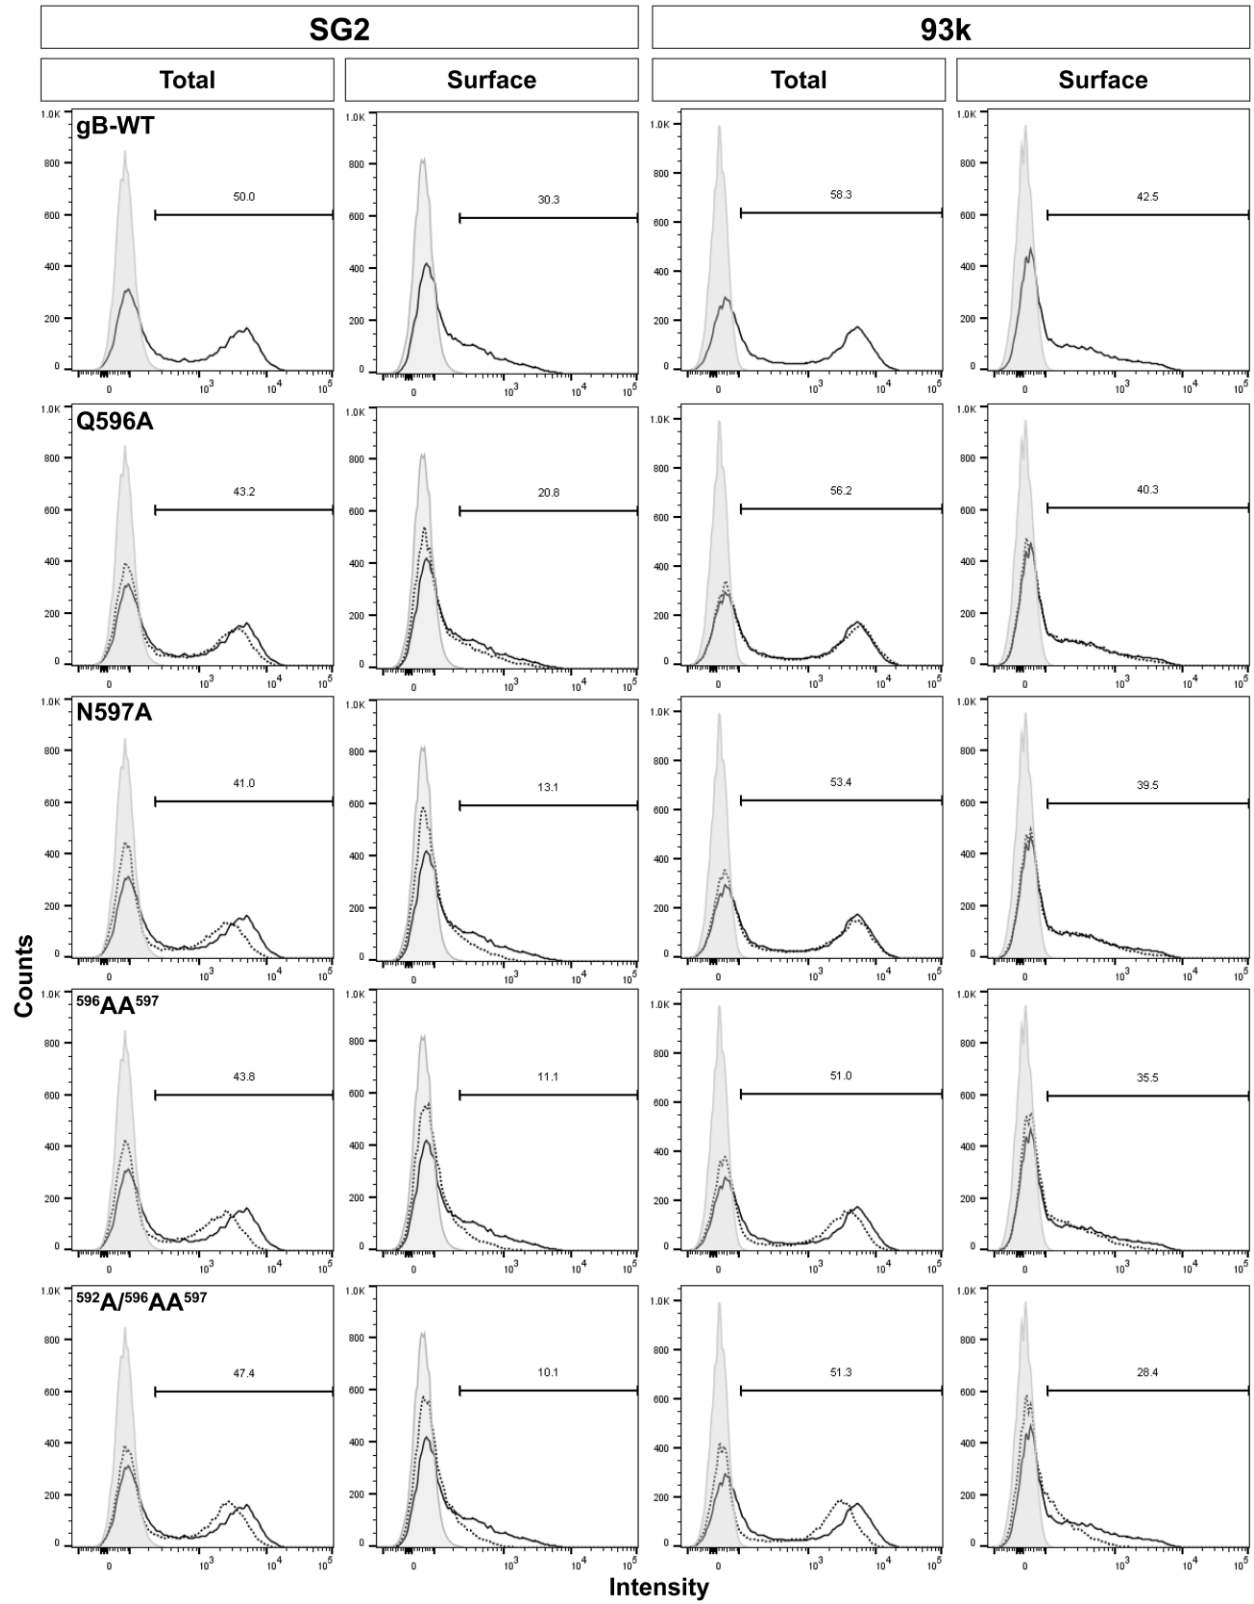

**Supplementary Figure 5. The detection of VZV gB  $\beta$ 23 mutants on transfected CHO cells by mAbs SG2 and 93k using flow cytometry.** A – Gating strategy for the quantification of gB levels using mAbs SG2 and 93k in flow cytometry. The representative samples are for total and surface staining of CHO cells transfected with gH or gB and detected with the anti-gB mAb SG2. The top panels represent examples of CHO cells gated using forward scatter (FSC) and side scatter (SSC). The lower panels represent the histograms from the gated CHO cells and show the specificity of the SG2 mAb for VZV gB. B - Histograms for total and surface stained gB for wild type (WT-gB) and the gB  $\beta$ 23 mutants S589, R592, I594, <sup>589</sup>AAA<sup>594</sup>, Q596A, N597A, <sup>596</sup>AA<sup>597</sup> and <sup>592</sup>A/<sup>596</sup>AA<sup>597</sup> are presented with fluorescence intensity along the abscissa and frequency along the ordinate. In all histograms the negative control (gH) is shaded grey, the positive control (WT-gB) a solid line and each of the mutants is a dotted line. Numbers above the gates (|---|) are the percentage of positive events for either surface stained or total gB as determined by either SG2 or 93k staining.

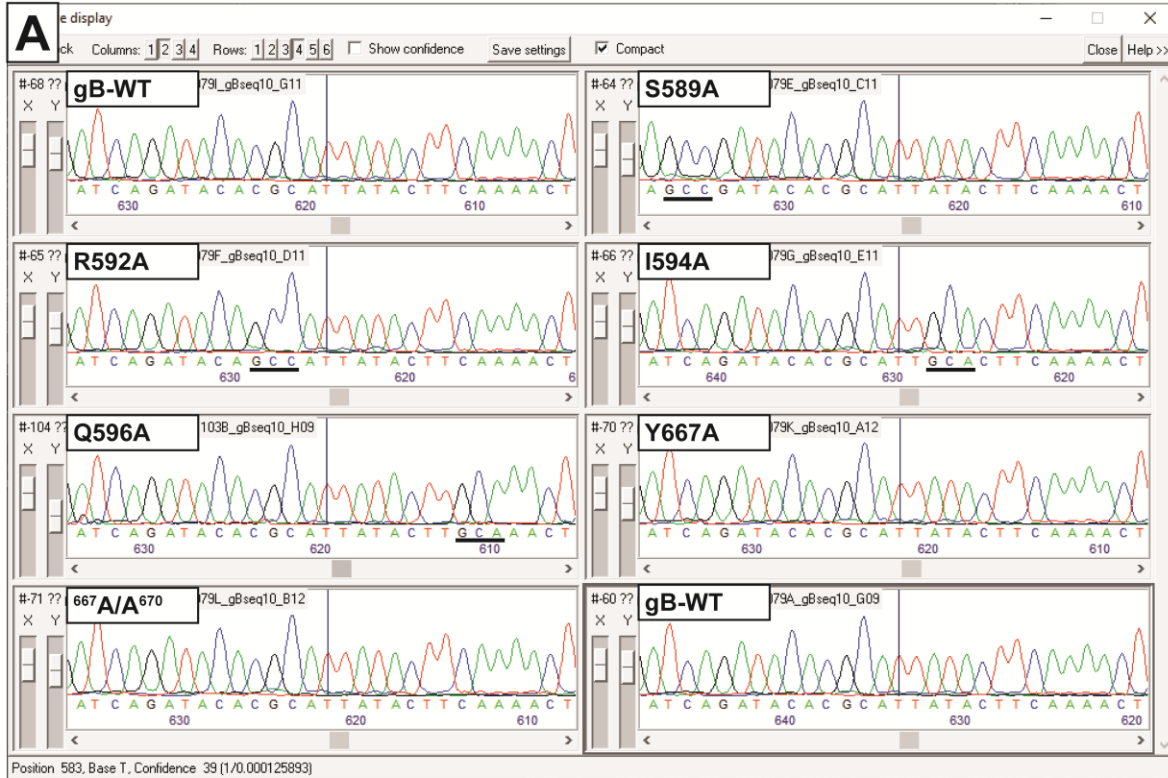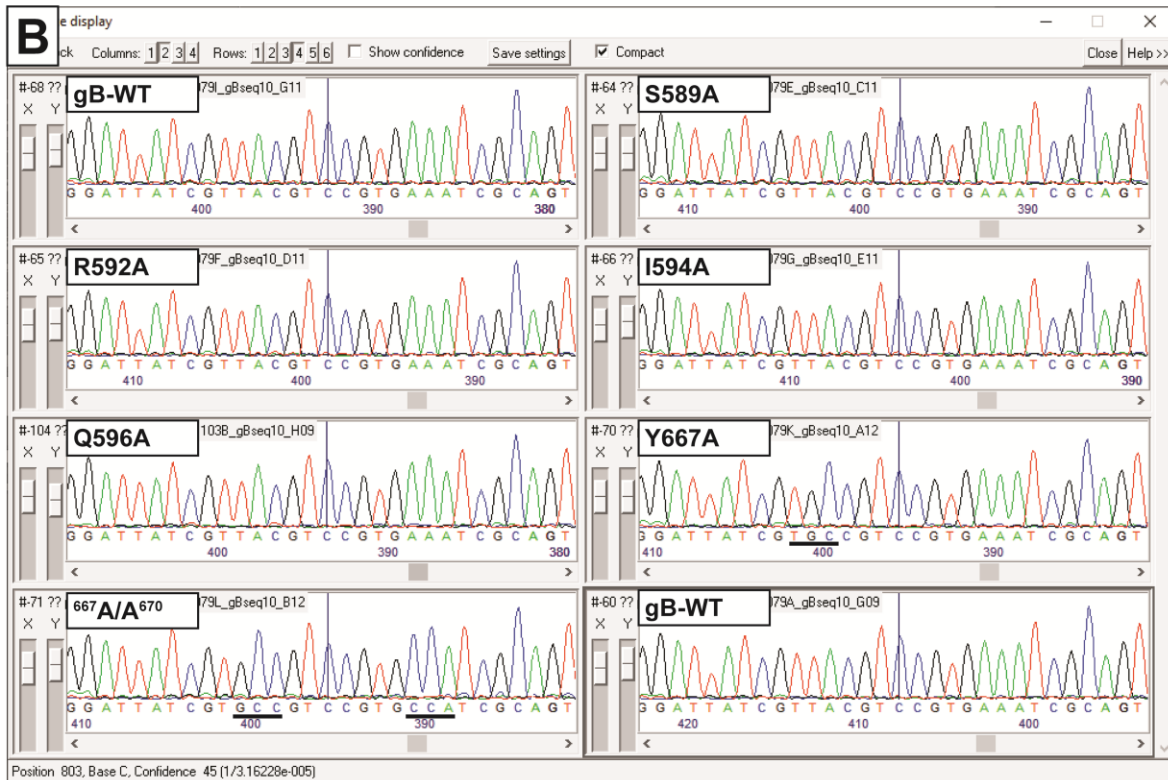

**Supplementary Figure 6. Sanger sequencing of VZV gB DIV mutant virus stocks.** PCR products generated from ORF31[gB] of virus stocks were sequenced to determine that only the expected mutations were present for each of the VZV gB DIV mutants generated from the transfection of MeWo cells with BACs. Electropherograms in the regions for the  $\beta$ 23 (B; S589A, R592A, I594A and Q596A) and  $\beta$ 30 (C; Y667 and <sup>667</sup>A/A<sup>670</sup>) mutants are shown with the codon for each of the alanine substitutions underlined. The coding DNA sequence and translated amino acids for gB-WT are provided under each panel with the substituted amino acids highlighted in red.

|                                      |   |   |   |   |   |   |   |   |   |
|--------------------------------------|---|---|---|---|---|---|---|---|---|
| Vector                               | + | - | - | - | - | - | - | - | - |
| gH-WT/gL                             | - | + | - | - | - | + | + | - | - |
| gH-V5/gL                             | - | - | + | - | - | - | - | + | + |
| gB-WT                                | - | - | - | + | - | + | - | + | - |
| gB <sup>-596</sup> AA <sup>597</sup> | - | - | - | - | + | - | + | - | + |

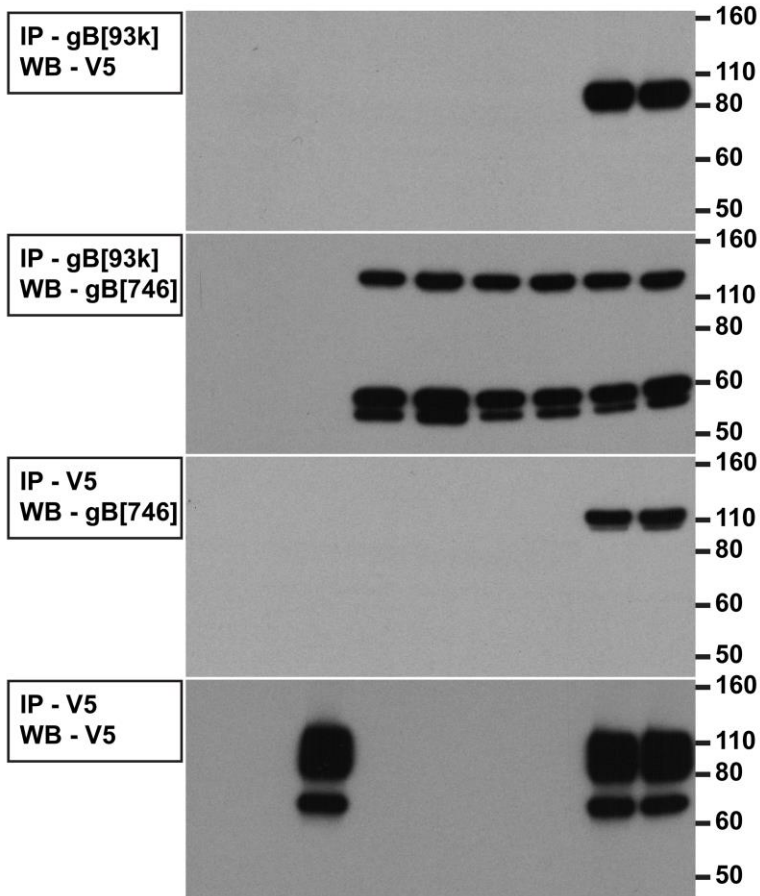

**Supplementary Figure 7. VZV gB stably interacts with VZV gH-gL.** Western blots (WB) of gB or gH-V5 immunoprecipitated (IP) using mAb 93k or anti-V5 agarose beads from CHO cells transfected with combinations (key above the blots) of gH-WT, gH-V5, gL, gB-WT and the VZV inactivating mutant, gB<sup>-596</sup>AA<sup>597</sup>. Western blots were performed using anti-gB Ab 746-868 or a mAb to V5. Numbers to the right of the blots are the values for molecular weight standards (kDa).

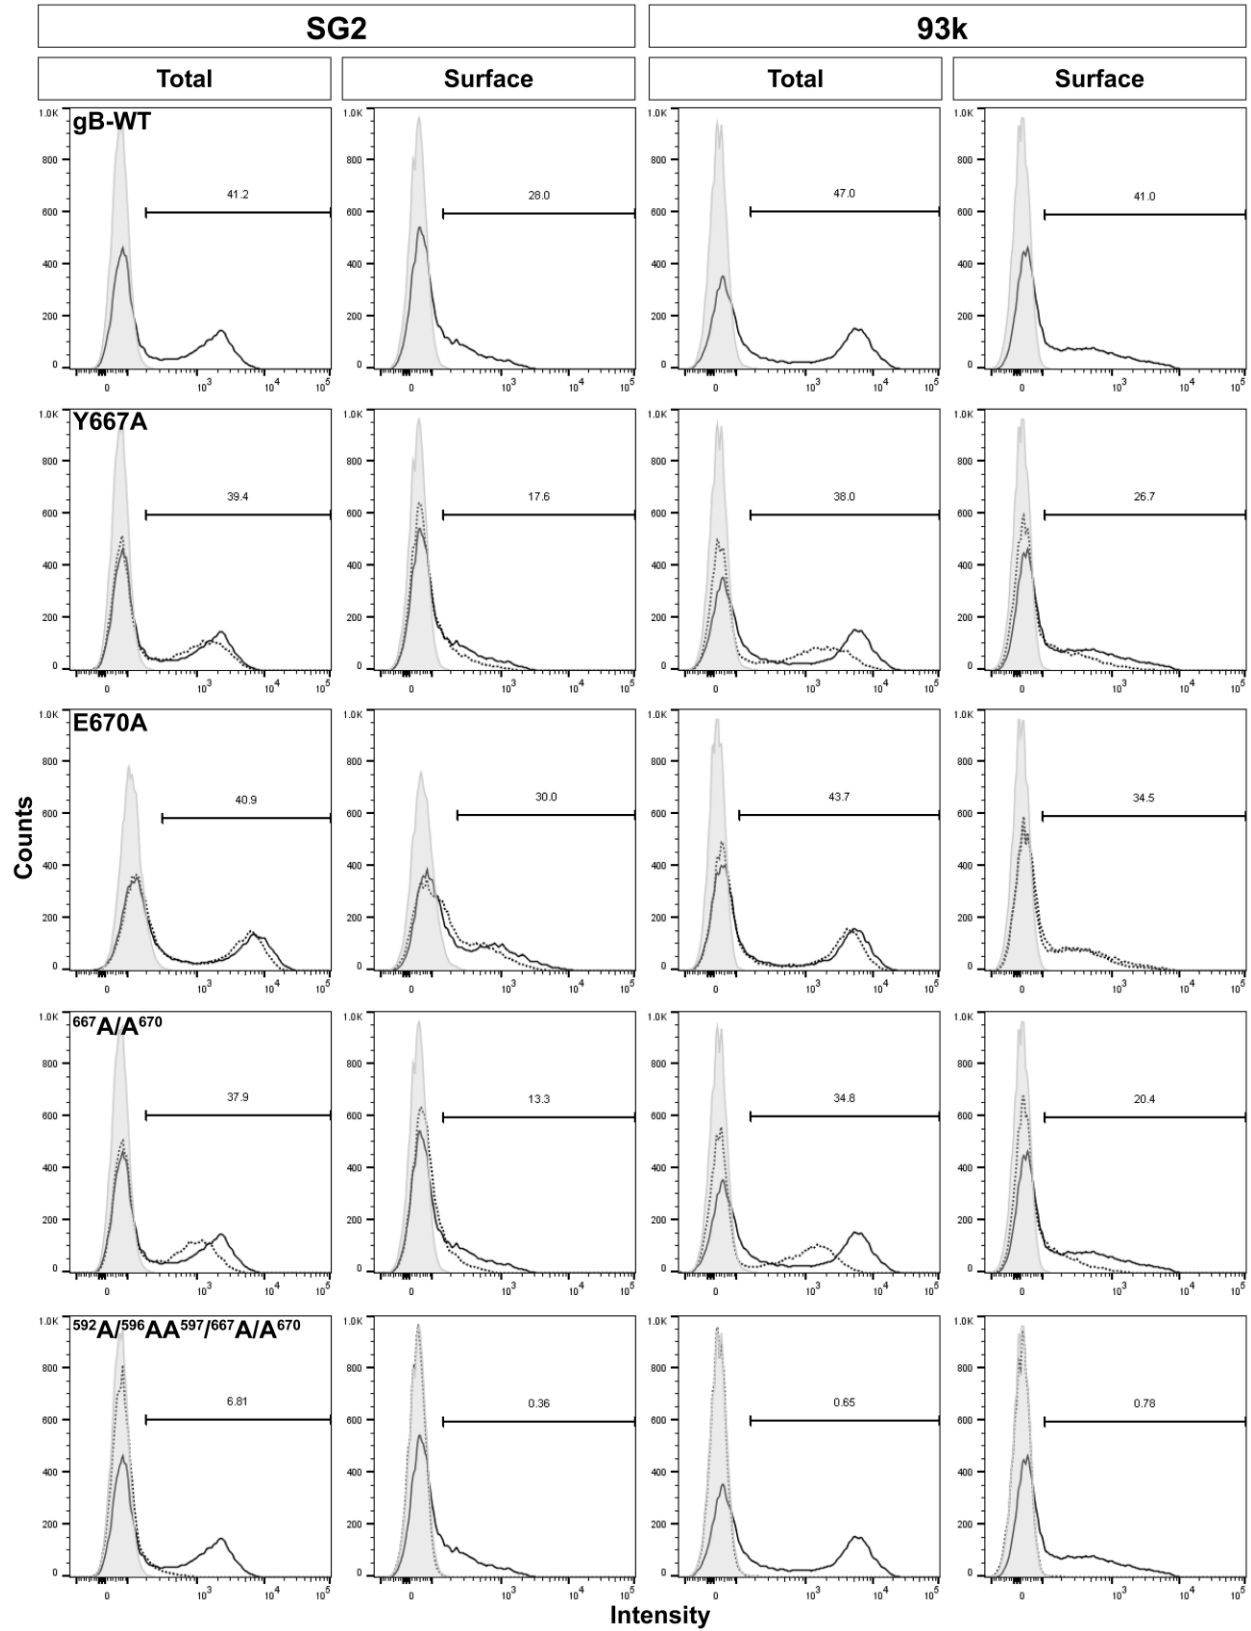



**Supplementary Figure 8. The detection of VZV gB  $\beta$ 30 mutants on transfected CHO cells by mAbs SG2 and 93k using flow cytometry.** Histograms for total and surface stained gB for wild type (WT-gB) and the gB  $\beta$ 30 mutants Y667A, E670A, <sup>667</sup>A/A<sup>670</sup> and <sup>592</sup>A/<sup>596</sup>AA<sup>597/667</sup>A/A<sup>670</sup> are presented with fluorescence intensity along the abscissa and frequency along the ordinate. In all of the histograms the negative control (gH) is shaded grey, the positive control (WT-gB) a solid line and each of the mutants a dotted line. Numbers above the gates (|---|) are the percentage of positive events for either surface stained or total gB as determined by either SG2 or 93k staining.

**Supplementary Table 1.** Cryo-EM data collection, refinement, and validation statistics for the 2.8Å structure of native, full-length VZV gB in complex with Fab fragments from human mAb 93k.

| <b>VZV gB-93k Fab: EMDB- 21247; PDB 6VN1</b>               |                         |
|------------------------------------------------------------|-------------------------|
| <b>Data collection and processing</b>                      | Titan Krios (FEI; TEM1) |
| Magnification                                              | 130,000X                |
| Voltage (kV)                                               | 300                     |
| Energy filter slit width (eV)                              | 20                      |
| Detector                                                   | K2 Summit (Gatan)       |
| Defocus range (µm)                                         | 1.5 to 2.0              |
| Pixel size (Å)                                             | 1.06                    |
| Exposure time (s)                                          | 12                      |
| Frames                                                     | 60                      |
| Electron dose (e <sup>-</sup> /s)                          | 7.5                     |
| Electron exposure rate (e <sup>-</sup> /Å <sup>2</sup> /s) | 1.335                   |
| Total electron exposure (e <sup>-</sup> /Å <sup>2</sup> )  | 16.02                   |
| Symmetry imposed                                           | 3                       |
| Micrographs collected (no.)                                | 11,283                  |
| Final particle images (no.)                                | 856,068                 |
| Map resolution (Å)                                         | 2.8                     |
| FSC threshold                                              | 0.143                   |
| Map resolution range (Å)                                   | 2 to >4                 |
| <b>Refinement</b>                                          |                         |
| Initial model used (PDB code)                              | 6VLK <sup>A</sup>       |
| Model resolution (Å)                                       | 2.8                     |
| FSC threshold                                              | 0.143                   |
| Model resolution range (Å)                                 | 2 to 4                  |
| Model composition                                          |                         |
| Chains                                                     | 12                      |
| Non-hydrogen atoms                                         | 19,563                  |
| Protein residues                                           | 2,454                   |
| <b>Validation</b>                                          |                         |
| B factors (Å <sup>2</sup> )                                |                         |
| Protein (min/max/mean)                                     | 4.8/93.2/23.1           |
| R.M.S. deviations                                          |                         |
| Bond lengths (Å)                                           | 0.006                   |
| Bond angles (°)                                            | 0.616                   |
| Validation                                                 |                         |
| MolProbity score                                           | 1.85                    |
| Clashscore                                                 | 7                       |
| Poor rotamers (%)                                          | 0                       |
| Ramachandran plot                                          |                         |
| Favored (%)                                                | 94                      |
| Allowed (%)                                                | 6                       |
| Disallowed (%)                                             | 0                       |

<sup>A</sup> X-ray crystallography data for VZV gB

**Supplementary Table 2.** Amino acid residues and color code for each domain in VZV gB.

| <b>Residues</b> | <b>Domain</b>  | <b>Color</b> |
|-----------------|----------------|--------------|
| 115-136         | IV             | Orange       |
| 137-147         | Linker: II-IV  | Hot Pink     |
| 148-159         | II             | Green        |
| 160-368         | I              | Cyan         |
| 369-464         | II             | Green        |
| 465-502         | II?            |              |
| 503-510         | Linker: II-III | Hot Pink     |
| 511-569         | III            | Yellow       |
| 570-681         | IV             | Orange       |
| 682-736         | V              | Red          |

**Supplementary Table 3.** Conserved cysteine bonds in herpesvirus gB orthologues.

| <b>Domain Location</b> | <b>Cysteine Residue Locations in gB</b> |            |            |             |            |
|------------------------|-----------------------------------------|------------|------------|-------------|------------|
|                        | <b>VZV</b>                              | <b>HSV</b> | <b>PRV</b> | <b>HCMV</b> | <b>EBV</b> |
| DIV                    | 122-584                                 | 116-573    | 129-603    | 94-551      | 51-528     |
| DII/IV linker to DIII  | 139-540                                 | 133-529    | 146-559    | 111-507     | 68-484     |
| DI                     | 213-277                                 | 207-271    | 220-284    | 185-250     | 141-206    |
| DII                    | 369-417                                 | 364-412    | 377-426    | 344-391     | 295-342    |
| DIV                    | 608-645                                 | 596-633    | 625-661    | 574-611     | 551-588    |

**Supplementary Table 4.** Q-score values for the amino acids that comprise the gB-93k interface.

| Protein | Subdomain      | Amino acid <sup>A</sup> | Q-score <sup>B</sup> |            |
|---------|----------------|-------------------------|----------------------|------------|
|         |                |                         | C $\alpha$           | Side Chain |
| VZV gB  | DIV N-terminus | T115                    | 0.84                 | 0.66       |
|         |                | K116                    | 0.85                 | 0.72       |
|         | DIV $\beta$ 23 | S589                    | 0.64                 | 0.48       |
|         |                | R592                    | 0.77                 | 0.68       |
|         |                | I593                    | 0.70                 | 0.74       |
|         |                | I594                    | 0.72                 | 0.74       |
|         |                | L595                    | 0.76                 | 0.71       |
|         |                | Q596                    | 0.77                 | 0.69       |
|         |                | N597                    | 0.73                 | 0.71       |
|         | DIV $\beta$ 25 | S615                    | 0.77                 | 0.68       |
|         |                | V617                    | 0.80                 | 0.71       |
|         |                | L619                    | 0.70                 | 0.66       |
|         | DIV $\beta$ 28 | F655                    | 0.74                 | 0.69       |
|         |                | DIV $\beta$ 29          | H658                 | 0.73       |
|         | DIV $\beta$ 30 |                         | Y667                 | 0.72       |
|         |                |                         | E670                 | 0.67       |
| 93k VH  | CDR2           | N31                     | 0.71                 | 0.63       |
|         |                | CDR3                    | I100                 | 0.80       |
|         | T101           |                         | 0.71                 | 0.72       |
|         | A102           |                         | 0.80                 | 0.66       |
|         | P103           |                         | 0.78                 | 0.70       |
|         | G104           |                         | 0.82                 | 0.75       |
|         | A105           |                         | 0.72                 | 0.64       |
|         | A106           |                         | 0.82                 | 0.68       |
|         | P107           |                         | 0.67                 | 0.68       |
|         | T108           |                         | 0.73                 | 0.69       |
|         | P109           |                         | 0.74                 | 0.71       |
|         | L110           |                         | 0.76                 | 0.71       |
|         | N111           | 0.75                    | 0.72                 |            |
| Y113    | 0.74           | 0.72                    |                      |            |
| 93k VL  | CDR1           | W32                     | 0.71                 | 0.73       |
|         |                | CDR2                    | Y49                  | 0.75       |
|         | I53            |                         | 0.77                 | 0.67       |
|         | E55            |                         | 0.82                 | 0.65       |
|         |                | N56                     | 0.63                 | 0.57       |

<sup>A</sup>Molecular interactions between the gB and 93k amino acids were calculated using UCSF Chimera<sup>4</sup>.

<sup>B</sup>Q-scores for C $\alpha$  and the amino acid side chains was calculated using MapQ<sup>3</sup>.

**Supplementary Table 5.** Key reagents and resources.

| <b>REAGENT or RESOURCE</b>                                                | <b>SOURCE</b>          | <b>IDENTIFIER</b> |
|---------------------------------------------------------------------------|------------------------|-------------------|
| <b>Antibodies</b>                                                         |                        |                   |
| Human mAb 93k                                                             | This paper             |                   |
| Mouse mAb SG2-2E6                                                         | GeneTex                | GTX38718          |
| Mouse mAb 206                                                             | 5                      |                   |
| Rabbit polyclonal antibody 746-868                                        | 6                      |                   |
| Mouse mAb IE62                                                            | EMD Millipore          | MAB8616           |
| Mouse anti-V5 tag                                                         | Bio-Rad                | MCA1360           |
| VZV mouse mixed mAb                                                       | Meridian Life Sciences | C05108MA          |
| Biotinylated goat anti-mouse IgG (H+L)                                    | Vector Labs. Inc.      | BA-9200           |
| Donkey anti-mouse Alexa Fluor 555                                         | Life Technologies      | A31570            |
| Goat anti-human Alexa Fluor 488                                           | Life Technologies      | A11013            |
| ECL™ Sheep anti-mouse IgG, Horseradish peroxidase linked whole antibody   | GE Healthcare UK Ltd   | NA931V            |
| ECL™ Donkey anti-rabbit IgG, Horseradish peroxidase linked whole antibody | GE Healthcare UK Ltd   | NA934V            |
| ECL™ Sheep anti-human IgG, Horseradish peroxidase linked whole antibody   | GE Healthcare UK Ltd   | NA933V            |
| <b>Bacterial and Virus Strains</b>                                        |                        |                   |
| pOka BAC derived (pPOKA-DX)                                               | 7                      |                   |
| GS1783                                                                    | 8                      |                   |
| pOka-TK-GFP                                                               | 9                      |                   |
| pOka-TK-GFP gB-TEVV5                                                      | This paper             |                   |
| pOka-TK-GFP gB-TEVV5 gB[S110A]                                            | This paper             |                   |
| pOka-TK-GFP gB-TEVV5 gB[Q111A]                                            | This paper             |                   |
| pOka-TK-GFP gB-TEVV5 gB[D112A]                                            | This paper             |                   |
| pOka-TK-GFP gB-TEVV5 gB <sup>[109AAAA<sup>112</sup>]</sup>                | This paper             |                   |
| pOka-TK-GFP gB-TEVV5 gB[S589A]                                            | This paper             |                   |
| pOka-TK-GFP gB-TEVV5 gB[R592A]                                            | This paper             |                   |
| pOka-TK-GFP gB-TEVV5 gB[I594A]                                            | This paper             |                   |
| pOka-TK-GFP gB-TEVV5 gB[Q596A]                                            | This paper             |                   |
| pOka-TK-GFP gB-TEVV5 gB[Y667A]                                            | This paper             |                   |
| pOka-TK-GFP gB-TEVV5 gB <sup>[667A/A<sup>670</sup>]</sup>                 | This paper             |                   |
| <b>Chemicals, Peptides, and Recombinant Proteins</b>                      |                        |                   |
| Anti-V5 Agarose Affinity Gel                                              | Sigma                  | A7345-1ML         |
| Bovine Serum Albumin (IgG Free, Protease Free)                            | Jackson ImmunoResearch | 001-000-162       |
| Minimal essential medium                                                  | Corning cellgro        | 10-010-CV         |
| F-12K nutrient mixture Kaighn's modification                              | Invitrogen             | 21127-022         |
| Optimem +Glutamax                                                         | Gibco                  | 51985-034         |
| Fetal bovine serum                                                        | Gibco                  | 26140-079         |



|                                             |                          |             |
|---------------------------------------------|--------------------------|-------------|
| Penicillin /Streptomycin                    | Gibco                    | 15140-122   |
| Amphotericin B                              | Corning cellgro          | 30-003-CF   |
| Nonessential amino acids                    | Corning cellgro          | 25-025-CI   |
| Puromycin                                   | Invitrogen               | A11138-03   |
| BstZ171                                     | New England BioLabs Inc. | R3594       |
| NaeI                                        | New England BioLabs Inc. | R0190L      |
| HindIII                                     | New England BioLabs Inc. | R0104L      |
| AgeI                                        | New England BioLabs Inc. | R0552L      |
| SpeI                                        | New England BioLabs Inc. | R0133L      |
| NotI                                        | New England BioLabs Inc. | R0189L      |
| KpnI                                        | New England BioLabs Inc. | R0142L      |
| XmaI                                        | New England BioLabs Inc. | R0180L      |
| NdeI                                        | New England BioLabs Inc. | R0111L      |
| AccuPrime™ Pfx DNA Polymerase               | Invitrogen               | 12344024    |
| KOD Extreme™ Hot Start DNA Polymerase       | EMD Millipore            | 71975-3     |
| Lipofectamine® 2000                         | Invitrogen               | 11668-019   |
| Ampicillin                                  | Sigma                    | A9518-100G  |
| Kanamycin                                   | Sigma                    | K4378       |
| LB (Miller's) Agar                          | Growcells                | MBPE-3060   |
| LB (Miller's) Broth                         | Growcells                | MBPE-1050   |
| PBS (Phosphate buffered saline)             | Corning cellgro          | 21-040-CV   |
| DPBS (Dulbecco's phosphate buffered saline) | Corning cellgro          | 21-030-CV   |
| Tris Base                                   | Fisher Scientific        | BP152-5     |
| Sodium chloride                             | Fisher Scientific        | S271-10     |
| Potassium chloride                          | Fisher Scientific        | BP366-500   |
| Magnesium chloride                          | Fisher Scientific        | M33-500     |
| Sodium deoxycholate                         | ICN Biomedical Inc.      | 804312      |
| IGEPAL® CA-630                              | Sigma                    | I3021-100ML |
| Triton X-100                                | Sigma                    | T-9284      |
| Tobacco etch virus protease                 | In house                 |             |
| Tris buffered saline (TBS; pH7.4)           | Sey Tek                  | TBS500      |
| Amphipol 8-35                               | Anatrace                 | A835        |
| Lauroylsarcosine                            | Sigma                    | L9150       |
| Bio-Beads™ SM-2                             | Bio-Rad                  | 152-3920    |
| Phosphotungstic acid                        | Ted Pella                | 19402       |
| EDTA                                        | Sigma                    | E9884       |
| Sucrose                                     | Sigma                    | S7903-1KG   |

|                                                                                           |                         |              |
|-------------------------------------------------------------------------------------------|-------------------------|--------------|
| L(+)-glutamic acid monosodium salt monohydrate                                            | Sigma                   | G1626-100G   |
| Paraformaldehyde (4%) in PBS                                                              | Boston Bioproducts      | K06J101      |
| BD Cytifix/Cytoperm™ Plus                                                                 | BD Biosciences          | 555028       |
| Hoechst 33342                                                                             | ThermoFisher Scientific | H-3570       |
| Native PAGE™ Sample Buffer                                                                | Novex                   | BN20032      |
| Native PAGE™ running buffer 20X                                                           | Novex                   | BN2001       |
| Native PAGE™ 20X cathode buffer additive                                                  | Novex                   | BN2002       |
| Native PAGE™ 3-12% Bis Tris Gel                                                           | Novex                   | BN2011BX10   |
| Laemmli Sample Buffer 2X                                                                  | Bio-Rad                 | 161-0737     |
| 2-mercaptoethanol                                                                         | Sigma                   | M7522-100ML  |
| Mini Protean® TGX™ Gels 4-20%                                                             | Bio-Rad                 | 456-1094     |
| NativeMark™ Protein Std.                                                                  | Invitrogen              | 57030        |
| Novex® Sharp Pre-Stained Protein Standards                                                | Invitrogen              | 57318        |
| Dimethyl pimelimidate dihydrochloride                                                     | Sigma                   | D8388        |
| Protein A Plus UltraLink® Resin                                                           | Thermo Scientific       | 53142        |
| Fluoromount-G®                                                                            | SouthernBiotech         | 0100-01      |
| Boric acid                                                                                | Sigma                   | B-0252       |
| Ethanolamine                                                                              | Sigma                   | 398136-500ML |
| Ethane                                                                                    | Airgas                  | ET R80       |
| L-(+)-Arabinose                                                                           | Sigma                   | A3256-100G   |
| Agarose LE                                                                                | AccuFlow                | EK2808       |
| Membrane permeable coelenterazine-H                                                       | Nanolight Technology    | 3012-10      |
| Fast Red TR Salt hemi (zinc chloride)                                                     | Sigma                   | 368881-25G   |
| Naphthol AS-MX phosphate                                                                  | Sigma                   | N4875-500MG  |
| Alkaline phosphatase-conjugated Streptavidin                                              | Jackson ImmunoResearch  | 016-050-084  |
| <b>Experimental Models: Cell Lines</b>                                                    |                         |              |
| MeWo                                                                                      | ATCC                    | HTB-65       |
| CHO-DSP1                                                                                  | 10                      |              |
| Mel-DSP2                                                                                  | 10                      |              |
| <b>Oligonucleotides (All sequences are 5' to 3')</b>                                      |                         |              |
| <b>TEVV5</b>                                                                              |                         |              |
| gB-AgeI<br>CTTTTTTGCCTACCGGTACGTGC                                                        | This study              | Elim Bio     |
| gB931<br>[ PHOS ] CACCCCGTTACATTCTCGGTGCG                                                 | This study              | Elim Bio     |
| gB-V5<br>[ PHOS ] <u>GGTAAGCCTATCCCTAACCCCTCTCCTCGGTCTCGA</u><br>TTCTACGTAAATAGCCAGGGGTTT | This study              | Elim Bio     |
| M13R<br>CACCCCGTTACATTCTCGGTGCG                                                           | Invitrogen              |              |

|                                                                                                           |            |          |
|-----------------------------------------------------------------------------------------------------------|------------|----------|
| <b>gB-Cterm-S-tag</b><br>[ PHOS ] GCTGTCCATGTGCTGGCGTTTCGAATTTAGCAGCAG<br>CGGTTTCTTTACCCCCGTTACATTCTCGG   | This study | Elim Bio |
| <b>gB-link_TEV_link</b><br>[ PHOS ] GCGGGCGGGGGCGGGGAGAATCTTTATTTTCAGGG<br>CGGGGGCGGGGGTAAGCCTATCCCTAACCC | This study | Elim Bio |
| <b>ΔS-tag-sense</b><br>[ PHOS ] GCGGGCGGGGGCGGGGAGATTG                                                    | This study | Elim Bio |
| <b>ΔS-tag-antisense</b><br>[ PHOS ] CACCCCCGTTACATTCTCGGTG                                                | This study | Elim Bio |
| <b>[31]F56625-56645</b><br>AGGTATAGGCAGTTCCCACGG                                                          | 11         | Elim Bio |
| <b>[31]R59697-59717</b><br>TTTCATTGAGACTTGAAGCGC                                                          | 11         | Elim Bio |
|                                                                                                           |            |          |
| <b>gB SRI 589/592/594</b>                                                                                 |            |          |
| <b>pCAGGs-gB-XmaI-sense</b><br>AGGAAGCCCGGGCTATTATTAACC                                                   | This study | Elim Bio |
| <b>S589A-antisense</b><br>[ PHOS ] TGTATCGGCTCCCAGTTCTGGACAATTAG                                          | This study | Elim Bio |
| <b>S589A-sense</b><br>[ PHOS ] CGCATTATACTTCAAAACTC                                                       | This study | Elim Bio |
| <b>pCAGGs-gB-AgeI-antisense</b><br>GCACGTACCGGTACGCAAAAAGG                                                | This study | Elim Bio |
| <b>R592A-antisense</b><br>[ PHOS ] TATAATGGCTGTATCTGATCCCAGTTCTG                                          | This study | Elim Bio |
| <b>pCAGGs-gB-3617-sense</b><br>[ PHOS ] CTTCAAACCTCTATGAGGGTA                                             | This study | Elim Bio |
| <b>I594A-antisense</b><br>[ PHOS ] TTGAAGTGCAATGCGTGTATCTGATCCCA                                          | This study | Elim Bio |
| <b>589AAA594-antisense</b><br>[ PHOS ] TATCGGCTCCCAGTTCTGGACAATTAGAAAC                                    | This study | Elim Bio |
| <b>589AAA594-sense</b><br>[ PHOS ] CAGCCATTGCACTTCAAACCTCTATGAGGGTATC                                     | This study | Elim Bio |
|                                                                                                           |            |          |
| <b>gB Q596A/N597A</b>                                                                                     |            |          |
| <b>Q596A-antisense</b><br>[ PHOS ] TGCAAGTATAATGCGTGTATCTG                                                | This study | Elim Bio |
| <b>pCAGGs-gB-3623-sense</b><br>[ PHOS ] AACTCTATGAGGGTATCTGGTAG                                           | This study | Elim Bio |
| <b>pCAGGs-gB-3622-antisense</b><br>[ PHOS ] TTGAAGTATAATGCGTGTATCTG                                       | This study | Elim Bio |
| <b>N597A-sense</b><br>[ PHOS ] GCGTCTATGAGGGTATCTGGTAG                                                    | This study | Elim Bio |
| <b>R592A-Q596A-antisense</b><br>[ PHOS ] TGCAAGTATAATGGCTGTATCTG                                          | This study | Elim Bio |
| <b>pCAGGs-gB-KpnI-sense</b><br>AACGGGAATTGGTACCCTATCAGCA                                                  | This study | Elim Bio |

|                                                                                                     |            |          |
|-----------------------------------------------------------------------------------------------------|------------|----------|
| pCAGGs-gB-NotI-BstZ171<br>TTAGCGGCCGCGAATTCGCCCTTGTATACACCCTAATGCAG<br>CGGCTGG                      | This study | Elim Bio |
| <b>gB-Y667A/E670A</b>                                                                               |            |          |
| pCAGGs-gB-MluI-sense<br>GGTAGTACTACGCGTTGTTATAGC                                                    | This study | Elim Bio |
| Y667A-antisense<br>[ PHOS ] GGCACGATAATCCTCATAATATACG                                               | This study | Elim Bio |
| V668-sense<br>[ PHOS ] GTCCGTGAAATCGCAGTCCATGATG                                                    | This study | Elim Bio |
| Y667-antisense<br>[ PHOS ] GTAACGATAATCCTCATAATATACG                                                | This study | Elim Bio |
| E670A-sense<br>[ PHOS ] GTCCGTGCCATCGCAGTCCATGATG                                                   | This study | Elim Bio |
| <b>Recombinant DNA</b>                                                                              |            |          |
| pRS5a-93k                                                                                           | This study |          |
| pCAGGs-VZVgB                                                                                        | 12         |          |
| pME18s                                                                                              | 12         |          |
| pME18s-gH[TL]                                                                                       | 12         |          |
| pME18s-gH[V5]                                                                                       | 9          |          |
| pCDNA3.1(+)                                                                                         | Invitrogen | V79020   |
| pCDNA3.1-gL                                                                                         | 13         |          |
| pCAGGs-gB[S589A]                                                                                    | This study |          |
| pCAGGs-gB[R592A]                                                                                    | This study |          |
| pCAGGs-gB[I594A]                                                                                    | This study |          |
| pCAGGs-gB[ <sup>589</sup> AAA <sup>594</sup> ]                                                      | This study |          |
| pCAGGs-gB[Q596A]                                                                                    | This study |          |
| pCAGGs-gB[N597A]                                                                                    | This study |          |
| pCAGGs-gB[ <sup>596</sup> AA <sup>597</sup> ]                                                       | This study |          |
| pCAGGs-gB[ <sup>592</sup> A/ <sup>596</sup> AA <sup>597</sup> ]                                     | This study |          |
| pCAGGs-gB[Y667A]                                                                                    | This study |          |
| pCAGGs-gB[E670A]                                                                                    | This study |          |
| pCAGGs-gB[ <sup>667</sup> A/A <sup>670</sup> ]                                                      | This study |          |
| pCAGGs-gB[ <sup>592</sup> A/ <sup>596</sup> AA <sup>597</sup> / <sup>667</sup> A/A <sup>670</sup> ] | This study |          |
| gB-Kan                                                                                              | 11         |          |
| gB-Kan-TEVV5                                                                                        | This study |          |
| pPOKA-TK-GFP-BAC-DX ΔORF31                                                                          | 9          |          |
| pPOKA-TK-GFP gB-TEVV5 gB[S589A]                                                                     | This study |          |
| pPOKA-TK-GFP gB-TEVV5 gB[R592A]                                                                     | This study |          |
| pPOKA-TK-GFP gB-TEVV5 gB[I594A]                                                                     | This study |          |
| pPOKA-TK-GFP gB-TEVV5 gB[Q596A]                                                                     | This study |          |

|                                                                                        |                             |                                                                                                                                           |
|----------------------------------------------------------------------------------------|-----------------------------|-------------------------------------------------------------------------------------------------------------------------------------------|
| pPOKA-TK-GFP gB-TEVV5 gB[N597A]                                                        | This study                  |                                                                                                                                           |
| pPOKA-TK-GFP gB-TEVV5 gB <sup>[596AA<sup>597</sup>]</sup>                              | This study                  |                                                                                                                                           |
| pPOKA-TK-GFP gB-TEVV5 gB <sup>[592A/596AA<sup>597</sup>]</sup>                         | This study                  |                                                                                                                                           |
| pPOKA-TK-GFP gB-TEVV5 gB[Y667A]                                                        | This study                  |                                                                                                                                           |
| pPOKA-TK-GFP gB-TEVV5 gB[E670A]                                                        | This study                  |                                                                                                                                           |
| pPOKA-TK-GFP gB-TEVV5 gB <sup>[667A/A<sup>670</sup>]</sup>                             | This study                  |                                                                                                                                           |
| pPOKA-TK-GFP gB-TEVV5<br>gB <sup>[592A/596AA<sup>597</sup>/667A/A<sup>670</sup>]</sup> | This study                  |                                                                                                                                           |
| <b>Software and Algorithms</b>                                                         |                             |                                                                                                                                           |
| SerialEM v3.7                                                                          | 14                          | <a href="http://bio3d.colorado.edu/SerialEM/">http://bio3d.colorado.edu/SerialEM/</a>                                                     |
| Relion v3.0                                                                            | 15,16                       | <a href="https://bitbucket.org/scheres/relion-3.0_beta/src/master/">https://bitbucket.org/scheres/relion-3.0_beta/src/master/</a>         |
| ResMap v1.95                                                                           | 1                           | <a href="https://sourceforge.net/projects/resmap-latest/">https://sourceforge.net/projects/resmap-latest/</a>                             |
| UCSF Chimera v1.13.1                                                                   | 4                           | <a href="http://www.cgl.ucsf.edu/chimera/">http://www.cgl.ucsf.edu/chimera/</a>                                                           |
| MapQ v1.5.4                                                                            | 3                           | <a href="https://cryoem.slac.stanford.edu/ncmi/resources/software/mapq">https://cryoem.slac.stanford.edu/ncmi/resources/software/mapq</a> |
| Phenix v1.17.1-3660                                                                    | 2                           | <a href="https://www.phenix-online.org/">https://www.phenix-online.org/</a>                                                               |
| WinCoot v0.8.9.2                                                                       | 17                          | <a href="http://bernhardcl.github.io/coot/">http://bernhardcl.github.io/coot/</a>                                                         |
| FlowJo CE 7.5.110.7                                                                    | TreeStar                    |                                                                                                                                           |
| FlowJo v10.6.2                                                                         | TreeStar                    |                                                                                                                                           |
| Prism 8 v8.4.1                                                                         | GraphPad Software, Inc.     |                                                                                                                                           |
| Staden Pregap v1.5 Gap v4.10                                                           | 18                          | <a href="http://staden.sourceforge.net">http://staden.sourceforge.net</a>                                                                 |
| GeneDoc v2.7                                                                           | Nicholas and Nicholas, 1997 | <a href="https://genedoc.sourceforge.informer.com/download/">https://genedoc.sourceforge.informer.com/download/</a>                       |
| BZ-X Viewer v1.3.0.6                                                                   | Keyence                     |                                                                                                                                           |
| BZ-X Analyzer v1.3.0.3                                                                 | Keyence                     |                                                                                                                                           |
| AxioVision v4.8                                                                        | Zeiss                       |                                                                                                                                           |
| FiJi (ImageJ 1.52i)                                                                    | NIH, USA                    | <a href="http://imagej.nih.gov/ij">http://imagej.nih.gov/ij</a>                                                                           |
| Illustrator CS6                                                                        | Adobe                       |                                                                                                                                           |
| Photoshop CS6                                                                          | Adobe                       |                                                                                                                                           |

|                                                          |                         |              |
|----------------------------------------------------------|-------------------------|--------------|
|                                                          |                         |              |
| <b>Other</b>                                             |                         |              |
| NativePAGE™ 2-12% Bis-Tris Gel                           | Invitrogen              | BN2011BX10   |
| Mini-PROTEAN® TGX™ Gels                                  | Bio-Rad                 | 456-1094     |
| Superose-6 Increase 3.2x300mm                            | Sigma                   | GE29-0915-98 |
| Ultrathin carbon film on lacey carbon support<br>400M Cu | Ted Pella               | 01824        |
| Quantifoil® R 1.2/1.3 Au 300 mesh grids                  | Quantifoil              |              |
| Leica EM GP                                              | Leica                   |              |
| Titan Krios                                              | FEI                     |              |
| Amicon Ultra-4 Centrifugal Filter Units 100kDa           | Millipore               | UFC810024    |
| Amicon Ultra-4 Centrifugal Filter Units 10kDa            | Millipore               | UFC801024    |
| QIAquick® Gel Extraction Kit                             | Qiagen                  | 28706        |
| QIAquick® Nucleotide Removal Kit                         | Qiagen                  | 28304        |
| QIAprep® Spin Miniprep Kit                               | Qiagen                  | 27106        |
| QIAGEN® Large-Construct Kit                              | Qiagen                  | 12462        |
| Immobilon®-P                                             | Merck Millipore<br>Ltd. | IPVH00010    |
| Optical bottom 96-well black sided culture plates        | Thermo Scientific       | 165305       |
| FACSCalibur flow cytometer                               | Becton Dickenson        |              |
| Synergy H1 Multi-mode Reader                             | Biotek                  |              |
| Nunclon™ Delta Surface 12-well plates                    | Thermo Scientific       | 150628       |
| Cell Culture 6-well plates                               | Corning                 | 3506         |
| Microscope cover glass 18mm No. 1                        | Fisher Scientific       | 12-545-100   |
|                                                          |                         |              |



## References.

- 1 Kucukelbir, A., Sigworth, F. J. & Tagare, H. D. Quantifying the local resolution of cryo-EM density maps. *Nat Methods* **11**, 63-65, (2014).
- 2 Adams, P. D. *et al.* PHENIX: a comprehensive Python-based system for macromolecular structure solution. *Acta Crystallogr D Biol Crystallogr* **66**, 213-221, (2010).
- 3 Pintilie, G. *et al.* Measurement of atom resolvability in cryo-EM maps with Q-scores. *Nat Methods* **17**, 328-334, (2020).
- 4 Pettersen, E. F. *et al.* UCSF Chimera--a visualization system for exploratory research and analysis. *J Comput Chem* **25**, 1605-1612, (2004).
- 5 Montalvo, E. A. & Grose, C. Neutralization epitope of varicella zoster virus on native viral glycoprotein gp118 (VZV glycoprotein gpIII). *Virology* **149**, 230-241, (1986).
- 6 Oliver, S. L. *et al.* Mutagenesis of varicella-zoster virus glycoprotein B: putative fusion loop residues are essential for viral replication, and the furin cleavage motif contributes to pathogenesis in skin tissue in vivo. *J Virol* **83**, 7495-7506, (2009).
- 7 Tischer, B. K. *et al.* A self-excisable infectious bacterial artificial chromosome clone of varicella-zoster virus allows analysis of the essential tegument protein encoded by ORF9. *J Virol* **81**, 13200-13208, (2007).
- 8 Tischer, B. K., Smith, G. A. & Osterrieder, N. En passant mutagenesis: a two step markerless red recombination system. *Methods Mol Biol* **634**, 421-430, (2010).
- 9 Yang, E., Arvin, A. M. & Oliver, S. L. The cytoplasmic domain of varicella-zoster virus glycoprotein H regulates syncytia formation and skin pathogenesis. *PLoS Pathog* **10**, e1004173, (2014).
- 10 Yang, E., Arvin, A. M. & Oliver, S. L. Role for the alphaV Integrin Subunit in Varicella-Zoster Virus-Mediated Fusion and Infection. *J Virol* **90**, 7567-7578, (2016).
- 11 Oliver, S. L. *et al.* An immunoreceptor tyrosine-based inhibition motif in varicella-zoster virus glycoprotein B regulates cell fusion and skin pathogenesis. *Proc Natl Acad Sci U S A* **110**, 1911-1916, (2013).
- 12 Suenaga, T. *et al.* Myelin-associated glycoprotein mediates membrane fusion and entry of neurotropic herpesviruses. *Proc Natl Acad Sci U S A* **107**, 866-871, (2010).
- 13 Vleck, S. E. *et al.* Structure-function analysis of varicella-zoster virus glycoprotein H identifies domain-specific roles for fusion and skin tropism. *Proc Natl Acad Sci U S A* **108**, 18412-18417, (2011).
- 14 Mastronarde, D. N. Automated electron microscope tomography using robust prediction of specimen movements. *J Struct Biol* **152**, 36-51, (2005).
- 15 Zivanov, J. *et al.* New tools for automated high-resolution cryo-EM structure determination in RELION-3. *Elife* **7**, (2018).
- 16 Scheres, S. H. RELION: implementation of a Bayesian approach to cryo-EM structure determination. *J Struct Biol* **180**, 519-530, (2012).
- 17 Emsley, P., Lohkamp, B., Scott, W. G. & Cowtan, K. Features and development of Coot. *Acta Crystallogr D Biol Crystallogr* **66**, 486-501, (2010).
- 18 Staden, R. The Staden sequence analysis package. *Mol Biotechnol* **5**, 233-241, (1996).
